# Supplementary material for: Molecular phenotypic profiling of a Saccharomyces cerevisiae strain at the single-cell level
Source: Royal Society of Chemistry journal article supplement (doi:10.1039/c4an01119h), 2014-01-01
Supplement: c4an01119h2.pdf [file c4an01119h2.pdf]

## Results from pooling cells

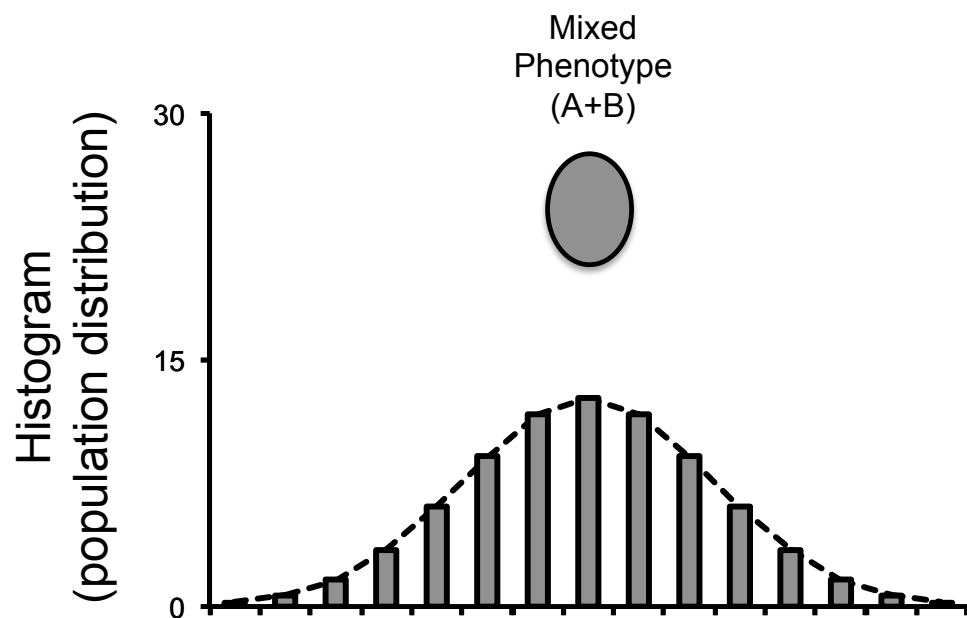

## Results from each cell individually

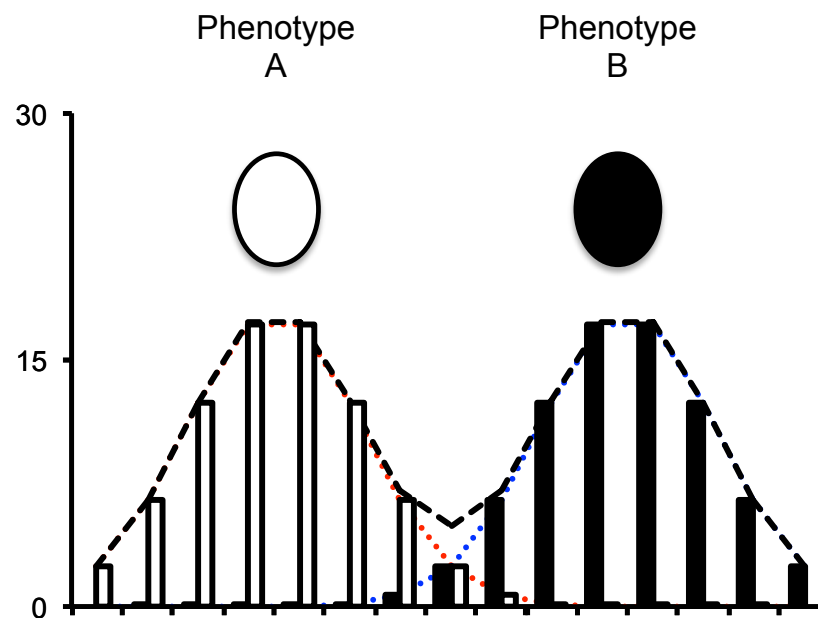

Metabolite signal  
(from the mass spectra)
