# Supplementary figures and images for: Molecular phenotypic profiling of a Saccharomyces cerevisiae strain at the single-cell level
Source: Royal Society of Chemistry journal article supplement (doi:10.1039/c4an01119h), 2014-01-01

## Principal component analysis (PC1 vs PC4)

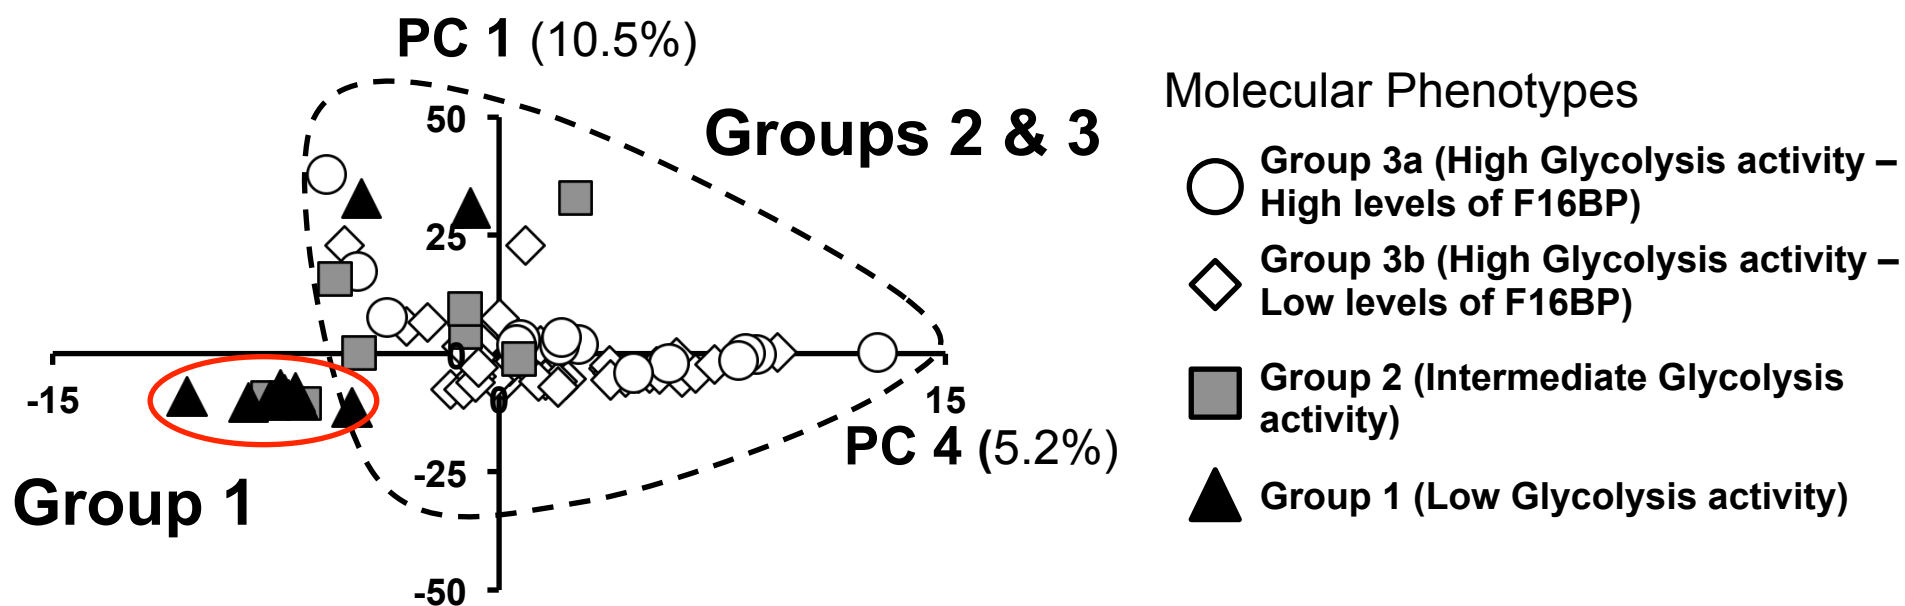

Supplement: c4an01119h7.pdf [file c4an01119h7.pdf]
